# Supplementary material for: Pd@BTL–Cd core–shell nanoparticles as plasmonic photocatalysts for the reductive amination of furfural in water
Source: Royal Society of Chemistry journal article supplement (doi:10.1039/d4dt03058c), 2025-01-01
Supplement: d4dt03058c1.pdf [file d4dt03058c1.pdf]

## SUPPORTING INFORMATION

### **Pd@BTL-Cd core-shell nanoparticles as plasmonic photocatalyst for the reductive amination of furfural in water**

Jyoti Rohilla<sup>a</sup>, Sahil Thakur<sup>a</sup>, Sahil Sharma<sup>b</sup>, Raghubir Singh<sup>b\*</sup>, Varinder Kaur<sup>a\*</sup>

<sup>a</sup>Department of Chemistry, Panjab University, Sector-14, Chandigarh-160014, India

<sup>b</sup>Department of Chemistry, DAV College, Sector 10, Chandigarh-160011, India

\*Corresponding author: [var\\_ka04@yahoo.co.in](mailto:var_ka04@yahoo.co.in) (V.K.), [raghubirsingh@davchd.ac.in](mailto:raghubirsingh@davchd.ac.in) (R.S.)

## Contents

| <b>List of Figures</b> |                                                                                                                                                                                                |                |
|------------------------|------------------------------------------------------------------------------------------------------------------------------------------------------------------------------------------------|----------------|
| <b>Figure S1</b>       | <sup>1</sup> H NMR spectrum of tripodal ligand BTL                                                                                                                                             | <b>S3</b>      |
| <b>Figure S2</b>       | <sup>13</sup> C NMR spectrum of tripodal ligand BTL                                                                                                                                            | <b>S3</b>      |
| <b>Figure S3</b>       | <sup>1</sup> H NMR spectrum of metal complex BTL-Cd                                                                                                                                            | <b>S4</b>      |
| <b>Figure S4</b>       | <sup>13</sup> C NMR spectrum of metal complex BTL-Cd                                                                                                                                           | <b>S4</b>      |
| <b>Figure S5</b>       | ESI-MS spectrum of tripodal ligand BTL                                                                                                                                                         | <b>S5</b>      |
| <b>Figure S6</b>       | ESI-MS spectrum of BTL-Cd metal complex                                                                                                                                                        | <b>S5</b>      |
| <b>Figure S7</b>       | Raman spectra of (a) BTL-Cd, and (b) Pd@BTL-Cd                                                                                                                                                 | <b>S6</b>      |
| <b>Figure S8</b>       | Particle size histogram of Pd@BTL-Cd core shell nanoparticles                                                                                                                                  | <b>S6</b>      |
| <b>Figure S9</b>       | FESEM images of (a-b) Pd@BTL-Cd                                                                                                                                                                | <b>S6</b>      |
| <b>Figure S10</b>      | (a) PXRD pattern of BTL-Cd showing a comparison of both experimental and simulated data, (b) PXRD pattern of Pd@BTL-Cd                                                                         | <b>S7</b>      |
| <b>Figure S11</b>      | XPS plots of (a) C 1s, (b) N 1s, and (c) O 1s of Pd@BTL-Cd                                                                                                                                     | <b>S7</b>      |
| <b>Figure S12</b>      | NH <sub>3</sub> TPD spectra of (a) BTL-Cd, (b) Pd@BTL-Cd                                                                                                                                       | <b>S8</b>      |
| <b>Figure S13</b>      | UV absorption spectrum of (a) PdCl <sub>2</sub> , (b) Pd NPs, (c) BTL-Cd, and (d) Pd@BTL-Cd                                                                                                    | <b>S8</b>      |
| <b>Figure S14</b>      | Kinetics curve of conversion of furfural to furfuryl amine to show the influence of reaction time, temperature, catalyst amount, substrate ammonia ratio                                       | <b>S9</b>      |
| <b>Figure S15</b>      | GC spectrum of the typical reaction mixture. Reaction conditions: 10 mg (Pd@BTL-Cd), 10 mmol (Furfural), 15 mmol (Aqueous ammonia), xenon light, 4 h.                                          | <b>S9</b>      |
| <b>Figure S16</b>      | The MS spectrum of furfuryl alcohol.                                                                                                                                                           | <b>S10</b>     |
| <b>Figure S17</b>      | The MS spectrum of Schiff base intermediate.                                                                                                                                                   | <b>S10</b>     |
| <b>Figure S18</b>      | The MS spectrum of furfuryl amine.                                                                                                                                                             | <b>S11</b>     |
|                        | <sup>1</sup> H and <sup>13</sup> C nmr of benzyl amine                                                                                                                                         | <b>S11</b>     |
|                        | <sup>1</sup> H and <sup>13</sup> C spectra of 2-pyridine methanamine                                                                                                                           | <b>S12</b>     |
|                        | <sup>1</sup> H and <sup>13</sup> C spectra of 2-thiophene methanamine                                                                                                                          | <b>S12</b>     |
| <b>Figure S19</b>      | Energy profile diagram of catalytic conversion of furfural to furfuryl amine.                                                                                                                  | <b>S13</b>     |
| <b>Figure S20</b>      | (a) Recyclability study of Pd@BTL-Cd, (b) PXRD pattern of Pd@BTL-Cd fresh catalyst and after 5th catalytic cycles, (c) FTIR spectra of Pd@BTL-Cd fresh catalyst and after 5th catalytic cycles | <b>S13</b>     |
| <b>List of Tables</b>  |                                                                                                                                                                                                |                |
| <b>Table S1</b>        | Crystallographic data and structural parameters for ligand BTL and BTL-Cd                                                                                                                      | <b>S14</b>     |
| <b>Table S2</b>        | Selected bond length (Å) and bond angle (°) for BTL and BTL-Cd                                                                                                                                 | <b>S15</b>     |
| <b>Table S3</b>        | Previous reported palladium based catalytic systems for reductive amination of furfural                                                                                                        | <b>S16</b>     |
| <b>Table S4</b>        | Optimization of different aldehyde sources for the catalytic activity of Pd@BTL-Cd                                                                                                             | <b>S16</b>     |
| <b>Section S1</b>      | <b>Detailed calculation of acidic active sites of Pd@BTL-Cd</b>                                                                                                                                | <b>S17</b>     |
| <b>Section S2</b>      | <b>Detailed calculation of Turnover Number</b>                                                                                                                                                 | <b>S17-S18</b> |

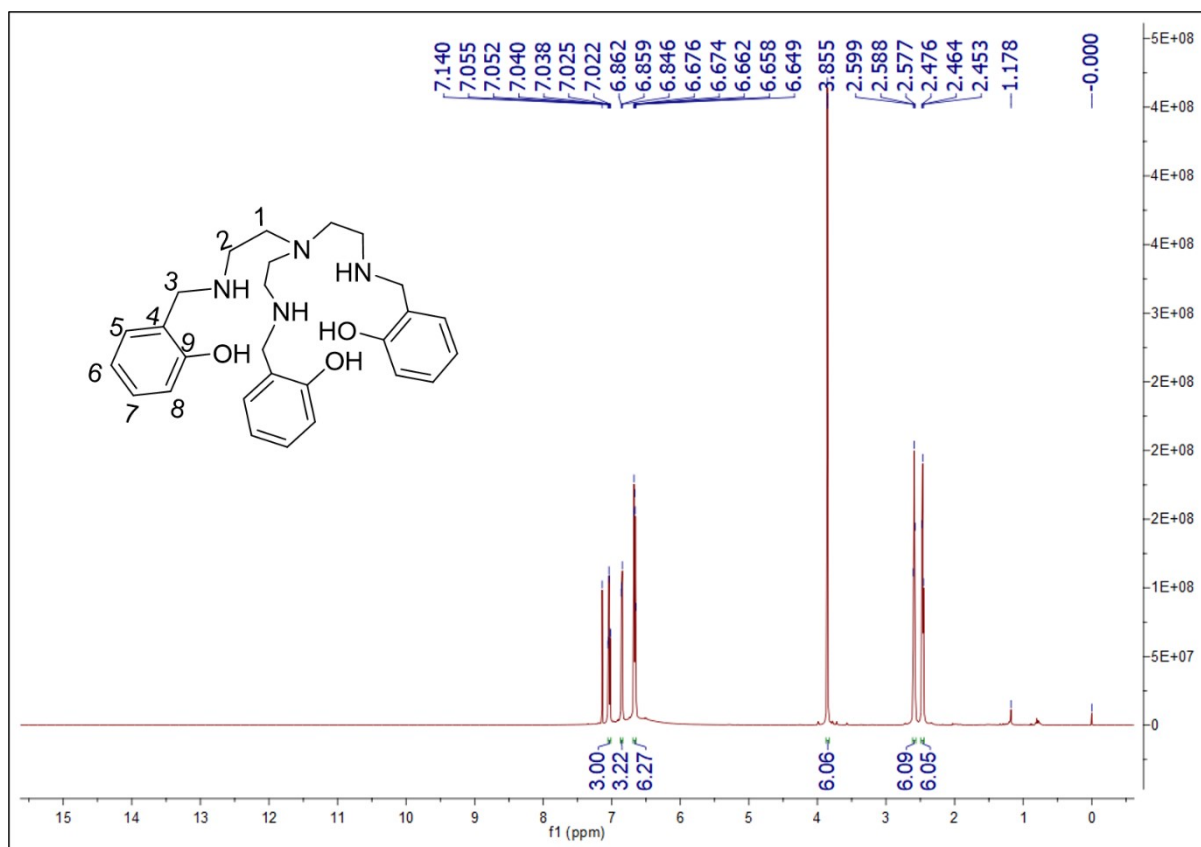

**Fig. S1**  $^1\text{H}$  NMR spectrum of tripodal ligand BTL

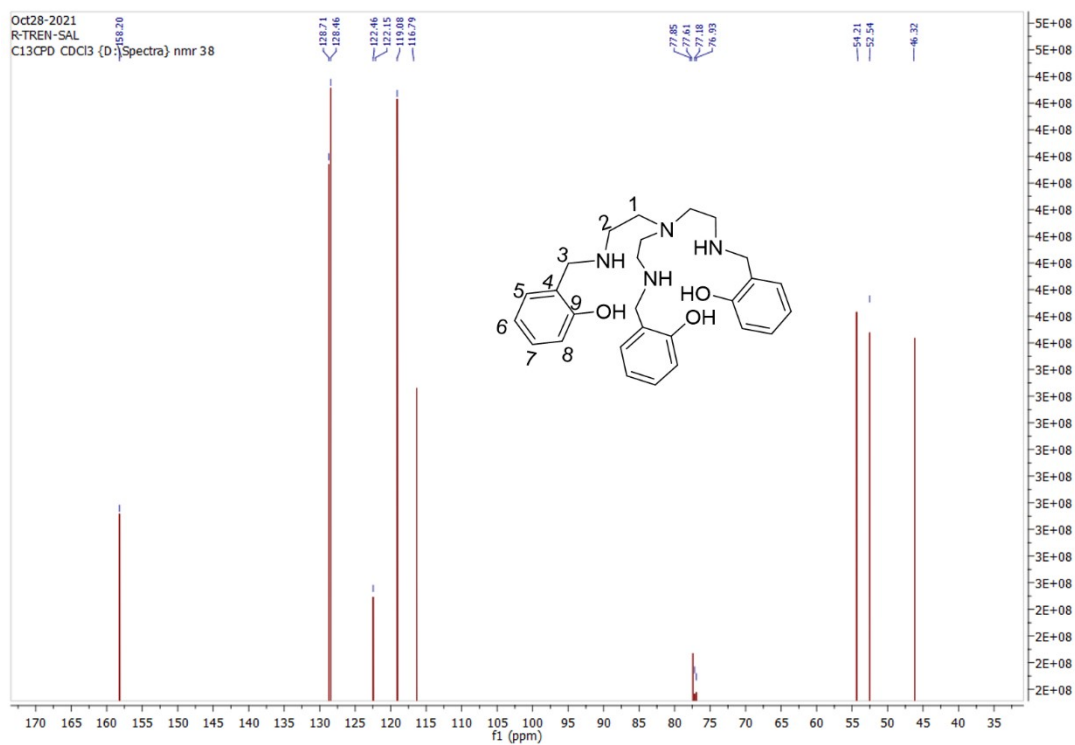

**Fig. S2**  $^{13}\text{C}$  NMR spectrum of tripodal ligand BTL

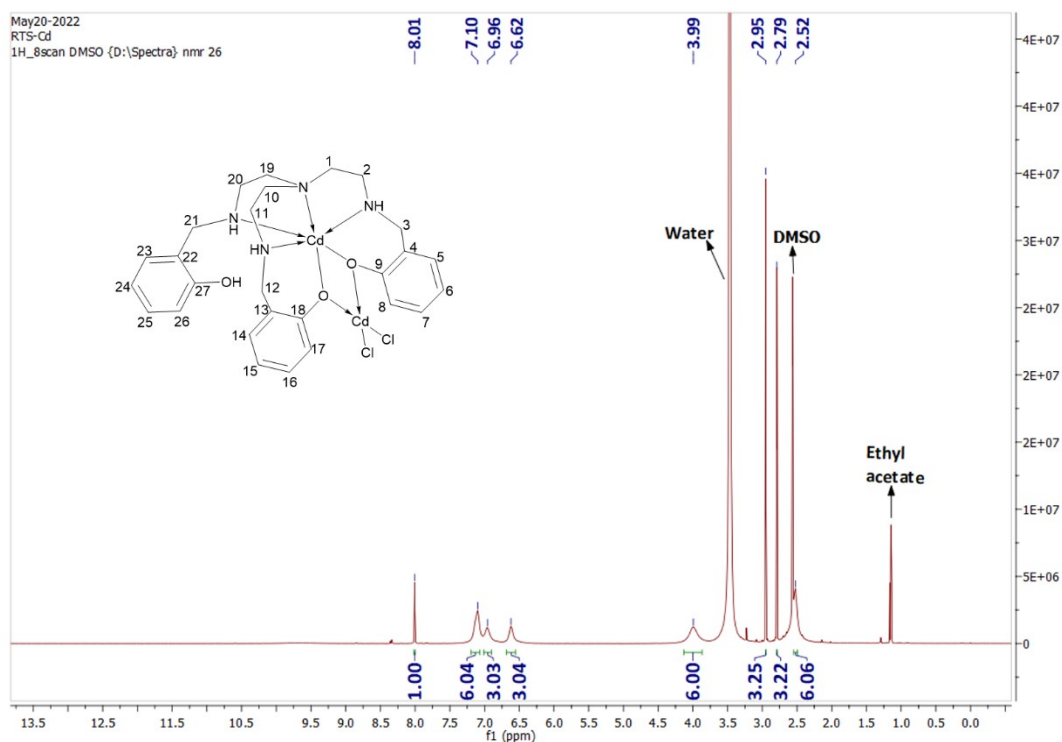

**Fig. S3**  $^1\text{H}$  NMR spectrum of metal complex BTL-Cd

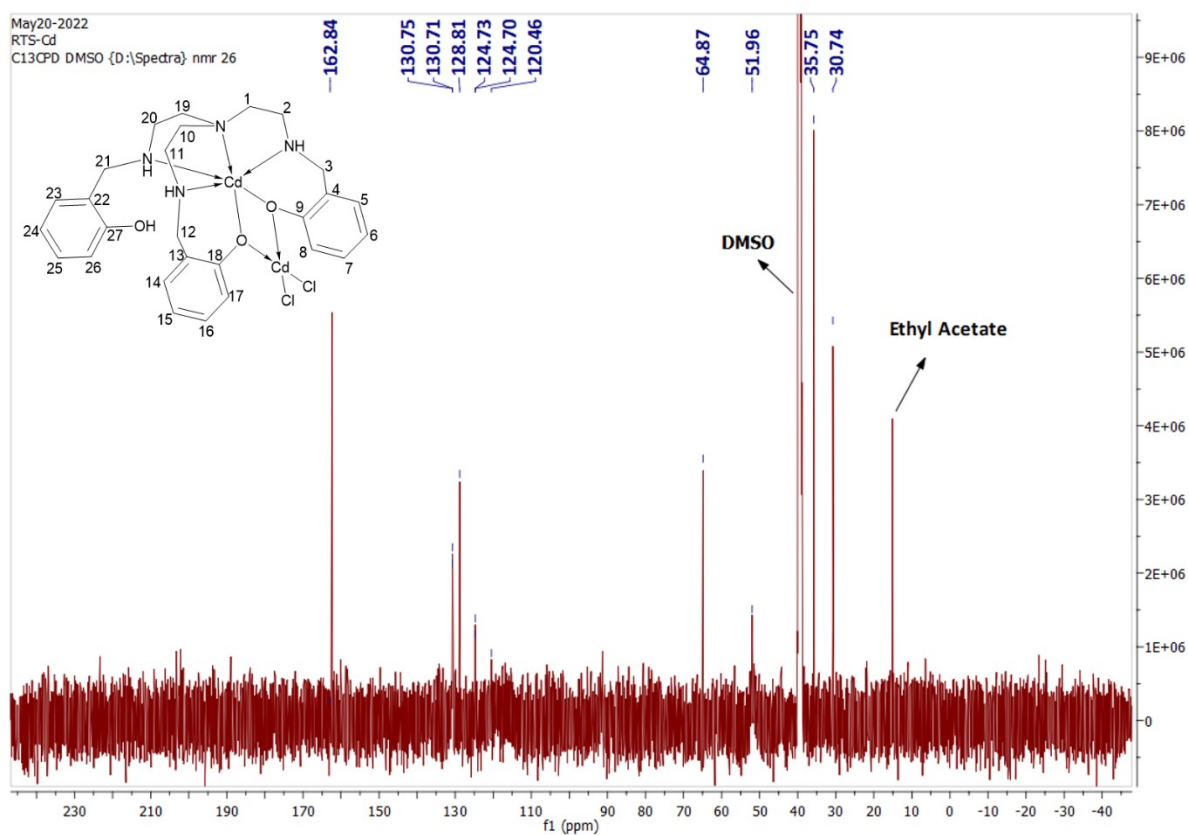

**Fig. S4**  $^{13}\text{C}$  NMR spectrum of metal complex BTL-Cd

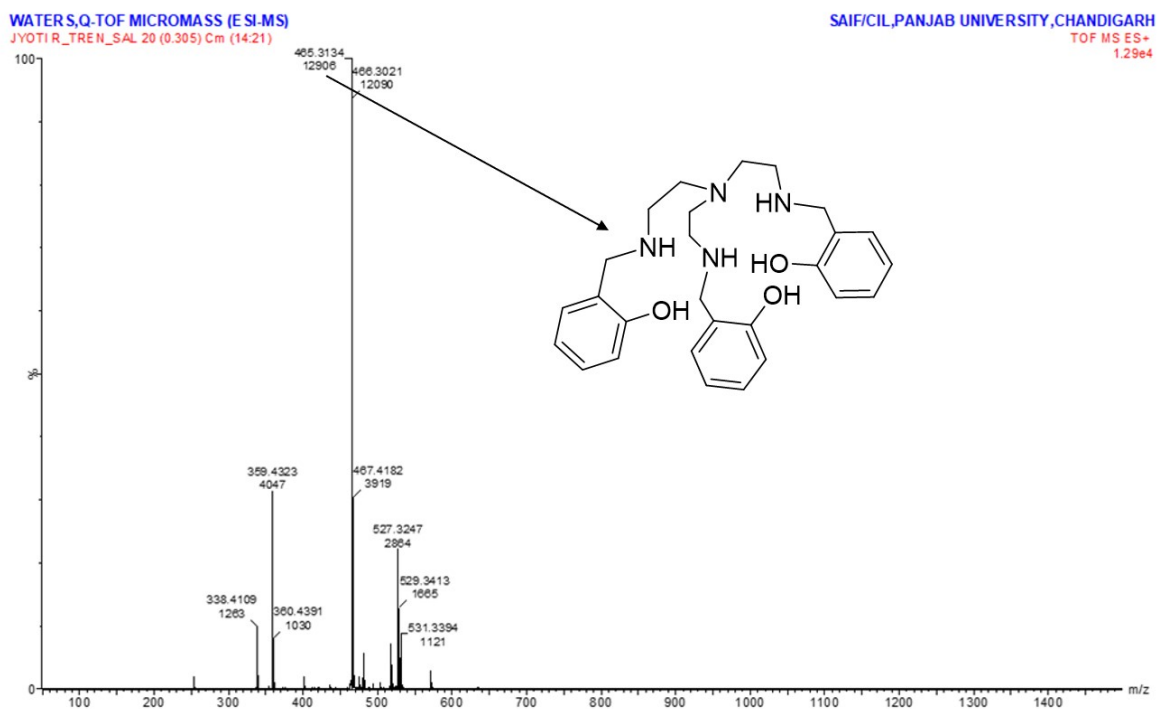

Fig. S5 ESI-MS spectrum of tripodal ligand BTL

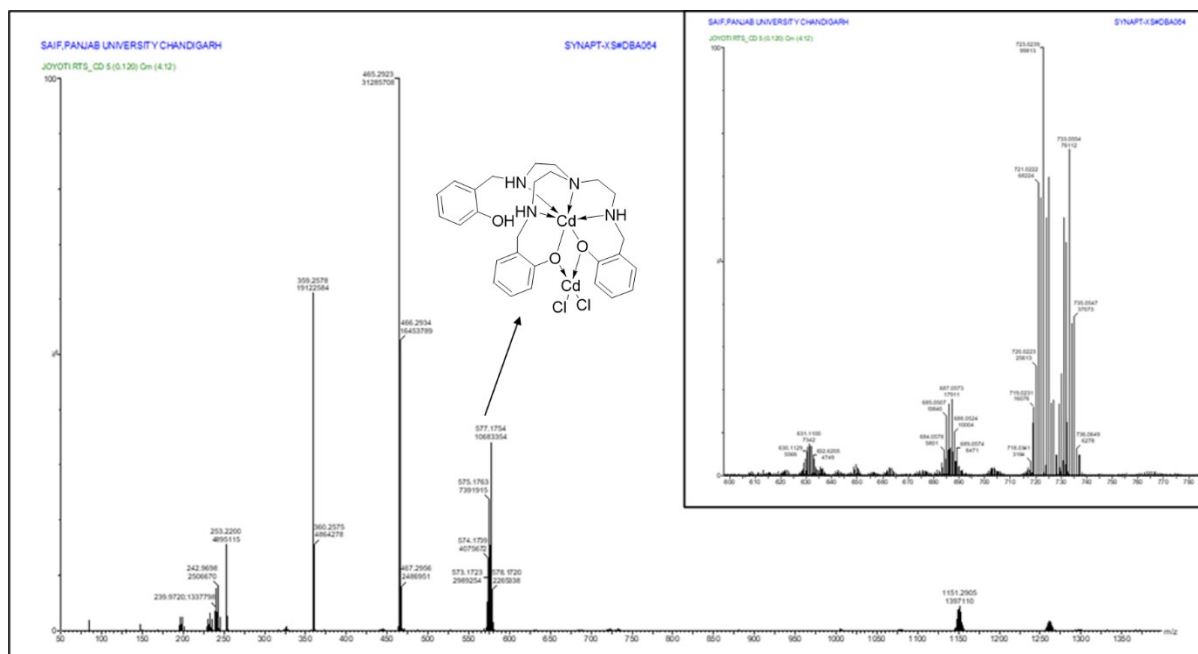

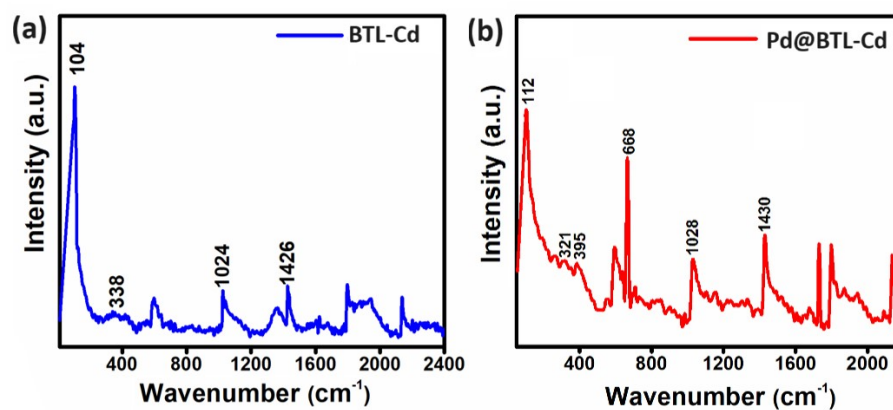

Fig. S7 Raman spectra of (a) BTL-Cd, and (b) Pd@BTL-Cd

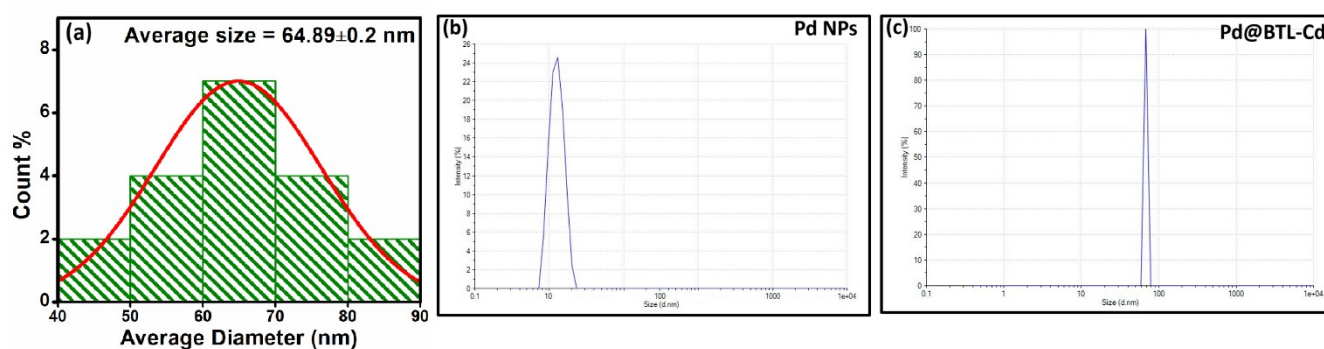

Fig. S8 (a) Particle size histogram of Pd@BTL-Cd core shell nanoparticle, DLS of (b) Pd NPs, and (c) Pd@BTL-Cd

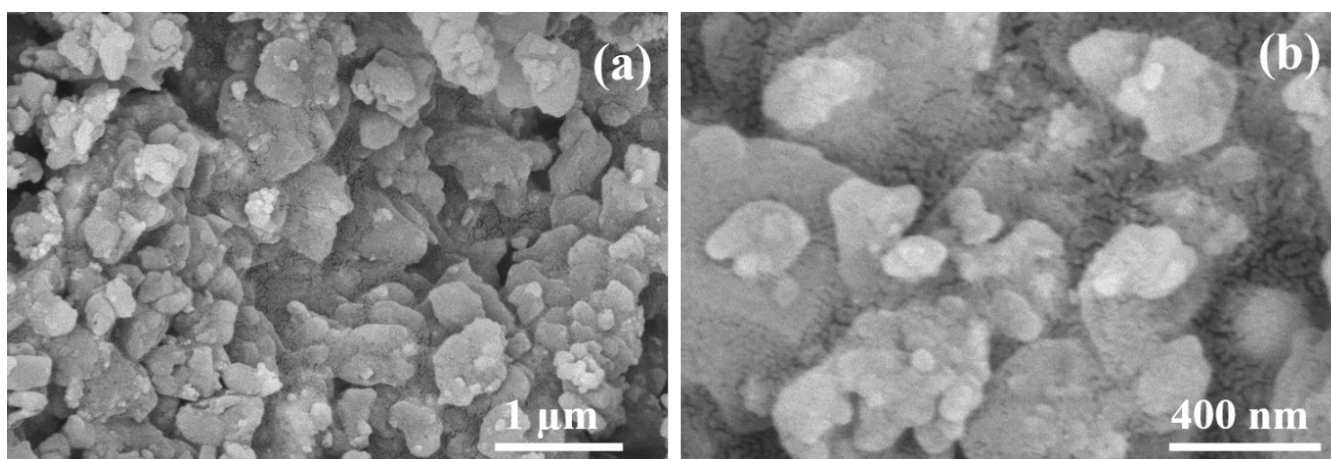

Fig. S9 FESEM images of (a-b) Pd@BTL-Cd

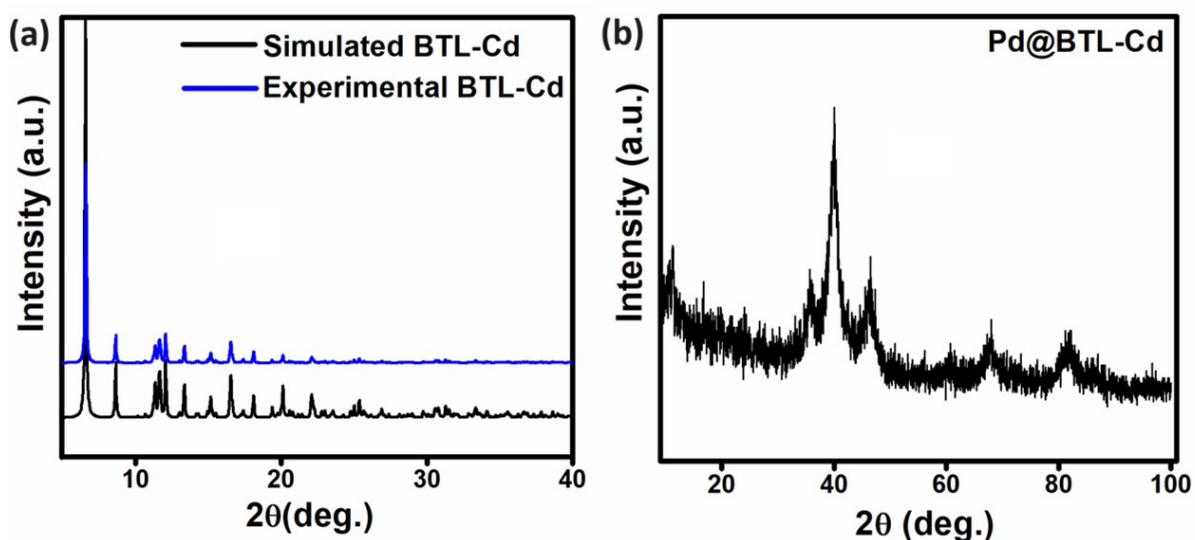

**Fig. S10** (a) XRD pattern of BTL-Cd showing a comparison of both experimental and simulated data, (b) XRD pattern of Pd@BTL-Cd

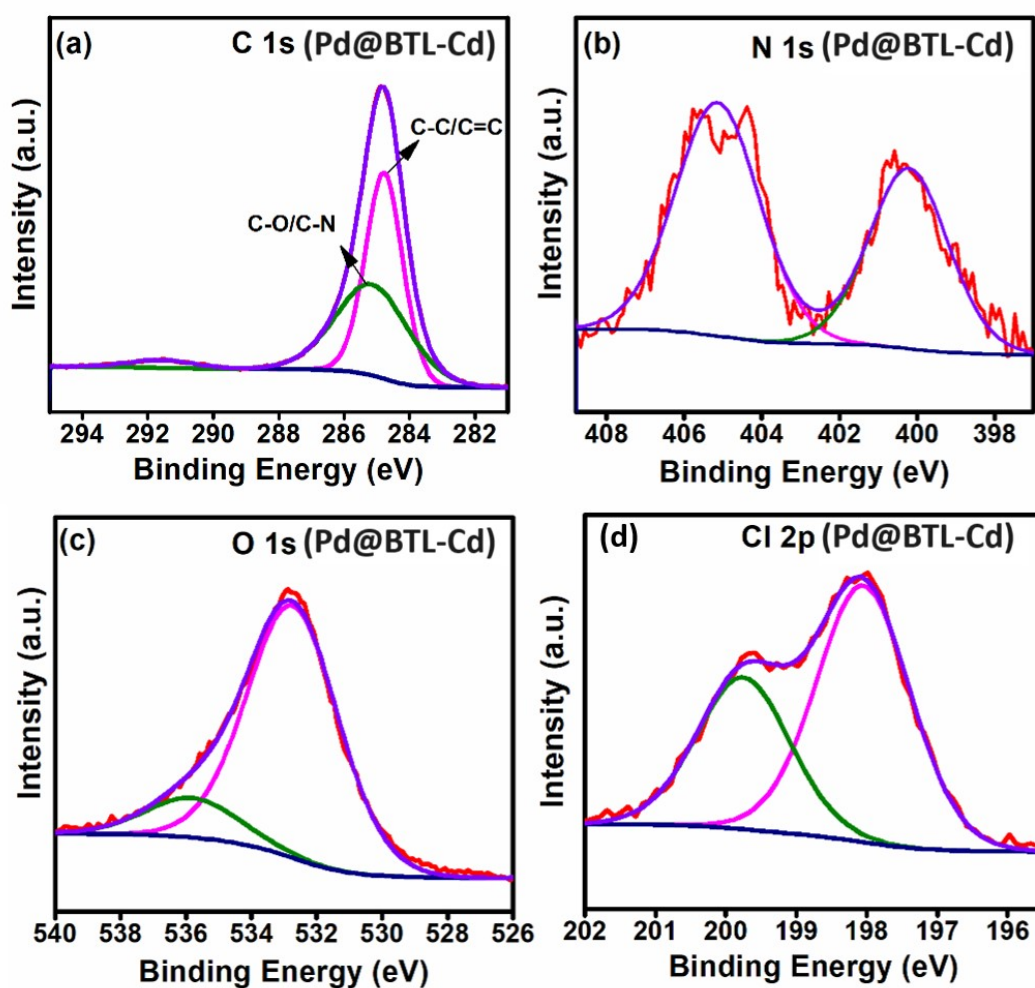

**Fig. S11** XPS plots of (a) C 1s (Pd@BTL-Cd), (b) N 1s (Pd@BTL-Cd), (c) O 1s (Pd@BTL-Cd), (d) Cl 2p (Pd@BTL-Cd)

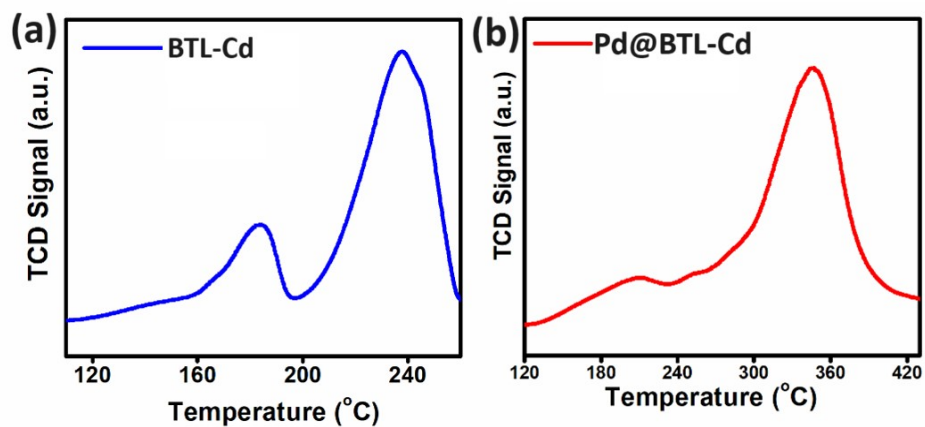

**Fig. S12**  $\text{NH}_3$ -TPD spectra of (a) BTL-Cd, (b) Pd@BTL-Cd

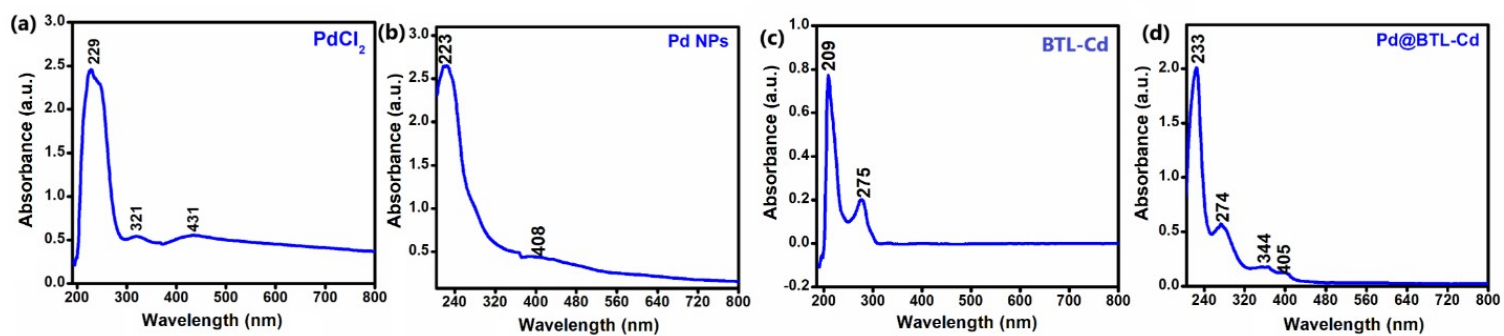

**Fig. S13** UV absorption spectrum of (a)  $\text{PdCl}_2$ , (b) Pd NPs, (c) BTL-Cd, and (d) Pd@BTL-Cd



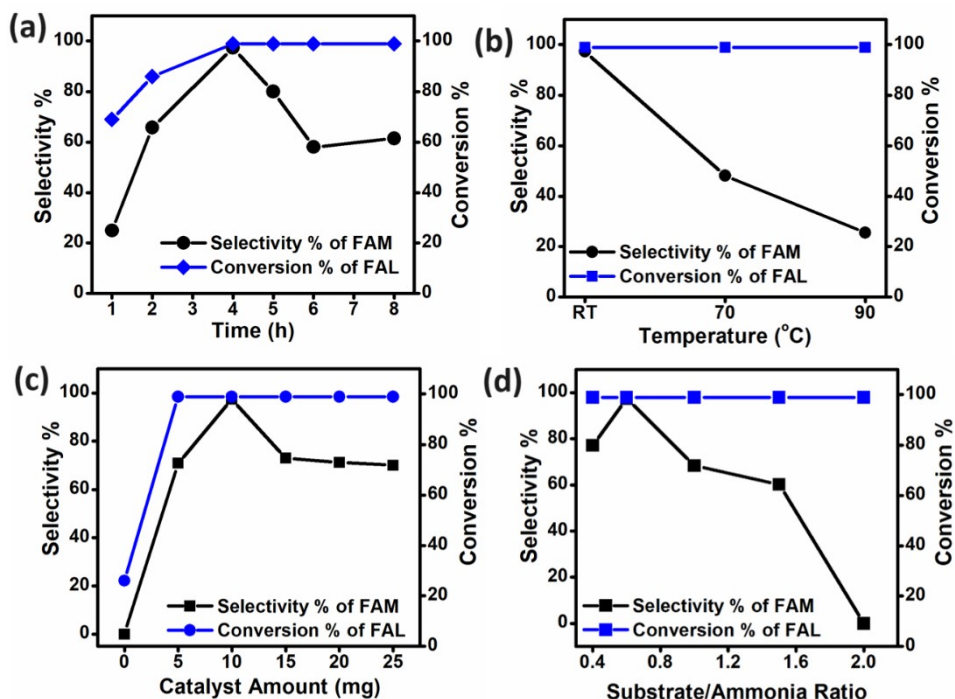

**Fig. S14** Kinetics curve of conversion of furfural to furfuryl amine to show the influence of reaction time, Reaction Conditions: Distilled water (15 ml), Room Temperature, 0.6 substrate/ammonia ratio, Catalyst amount =10 mg, (b) Kinetics curve of conversion of furfural to furfuryl amine to show the influence of temperature, Reaction Conditions: Distilled water (15 ml), 4 h, 0.6 substrate/ammonia ratio, Catalyst amount = 10 mg, (c) Kinetics curve of conversion of furfural to furfuryl amine to show the influence of catalyst amount, Reaction Conditions: Distilled water (15 ml), Room Temperature, 0.6 substrate/ammonia ratio 3 h, (d) Kinetics curve of conversion of furfural to furfuryl amine to show the influence of substrate/Ammonia ratio, Reaction conditions: Distilled water (15 ml), Room Temperature, 3 h, Catalyst amount =10 mg.

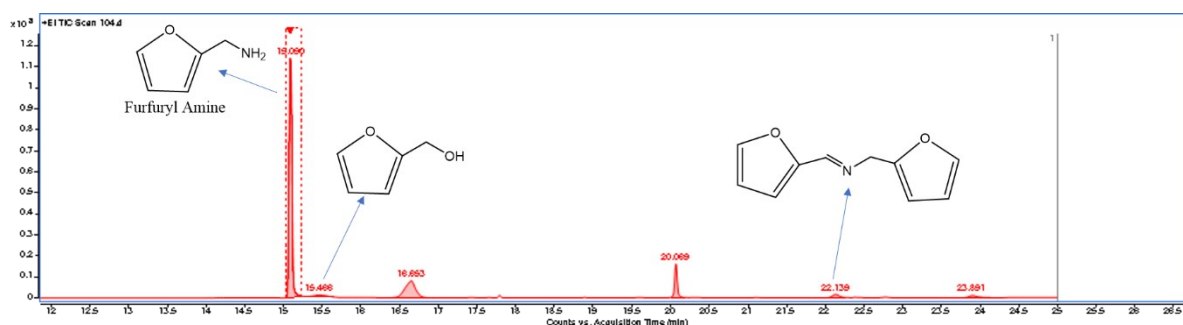

**Fig. S15** GC spectrum of the typical reaction mixture. Reaction conditions: 10 mg (Pd@BTL-Cd), 10 mmol (Furfural), 15 mmol (Aqueous ammonia), xenon light, 4 h

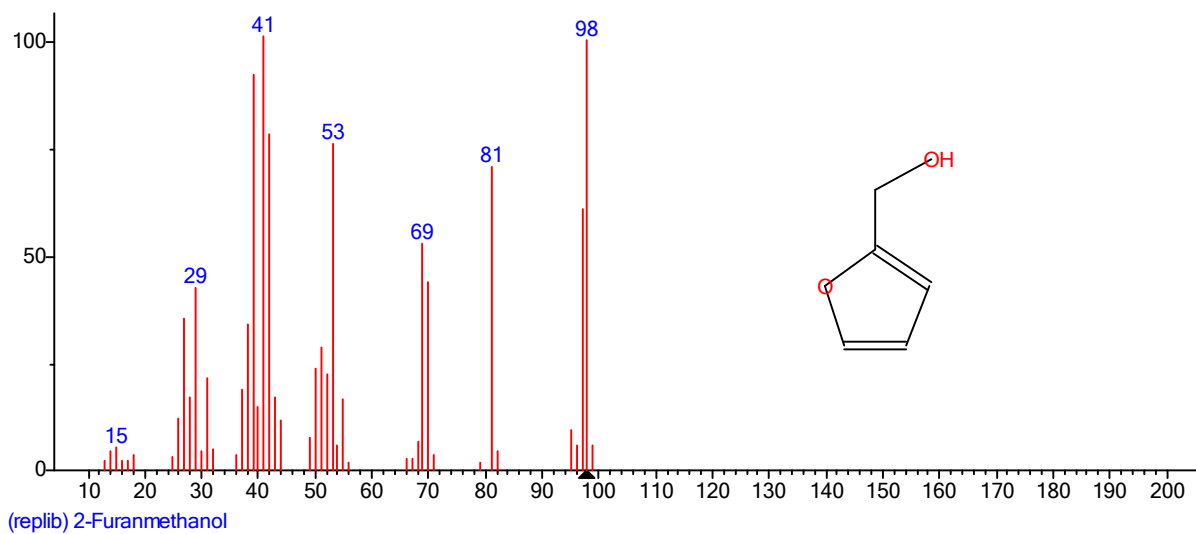

**Fig. S16** The MS spectrum of furfuryl alcohol.

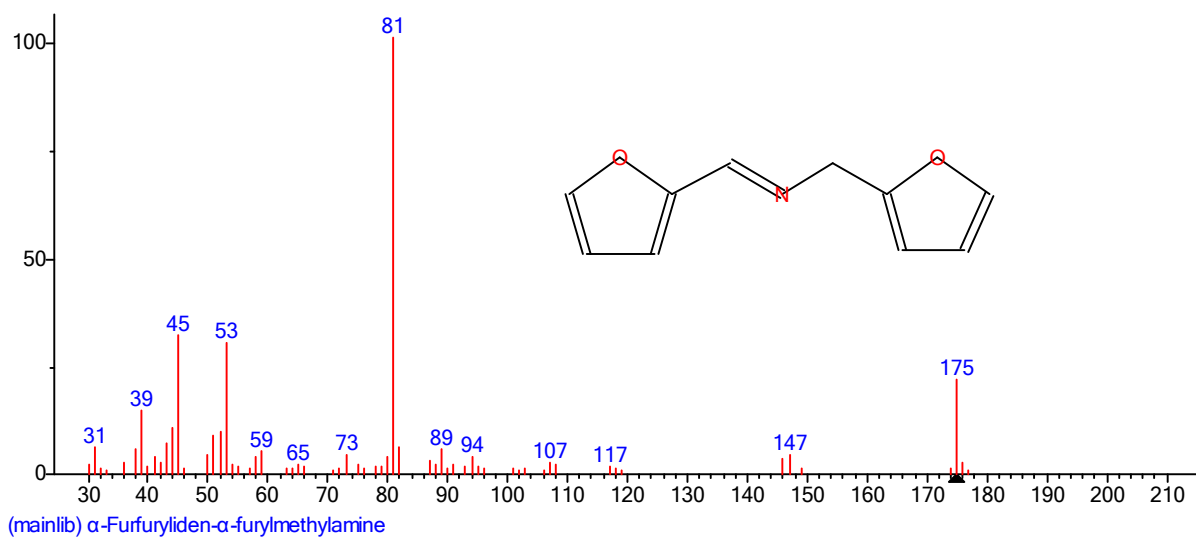

**Fig. S17** The MS spectrum of Schiff base intermediate.

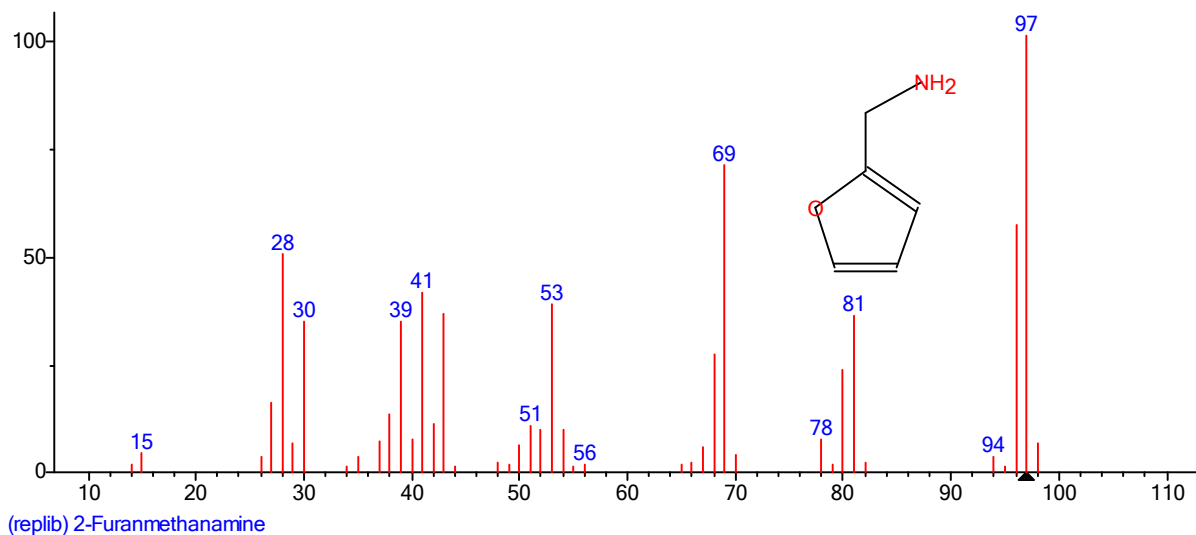

**Fig. S18** The MS spectrum of furfuryl amine

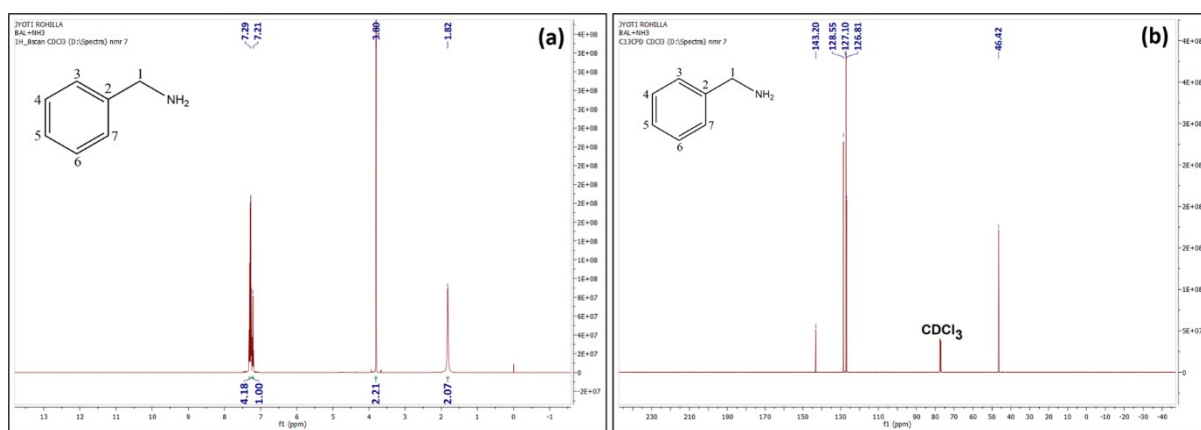

**Fig. S19**  $^1\text{H}$  and  $^{13}\text{C}$  nmr of benzyl amine [  $^1\text{H}$  NMR ( $\text{CDCl}_3$ , 500 MHz): 1.82 (s, 2H,  $-\text{NH}_2$ ), 3.80 (s, 2H,  $\text{H}^1$ ), 7.21 (t, 1H,  $3J = 10$  Hz,  $\text{H}^5$ ), 7.29 (m, 4H,  $3J = 10$  Hz,  $\text{H}^{3,4,6,7}$ ).  $^{13}\text{C}$  NMR ( $\text{CDCl}_3$ , 125 MHz): (46.42,  $\text{C}^1$ ), (126.81,  $\text{C}^5$ ), (127.10,  $\text{C}^3, \text{C}^7$ ), (128.55,  $\text{C}^4, \text{C}^6$ ), (143.19,  $\text{C}^2$ ) ].

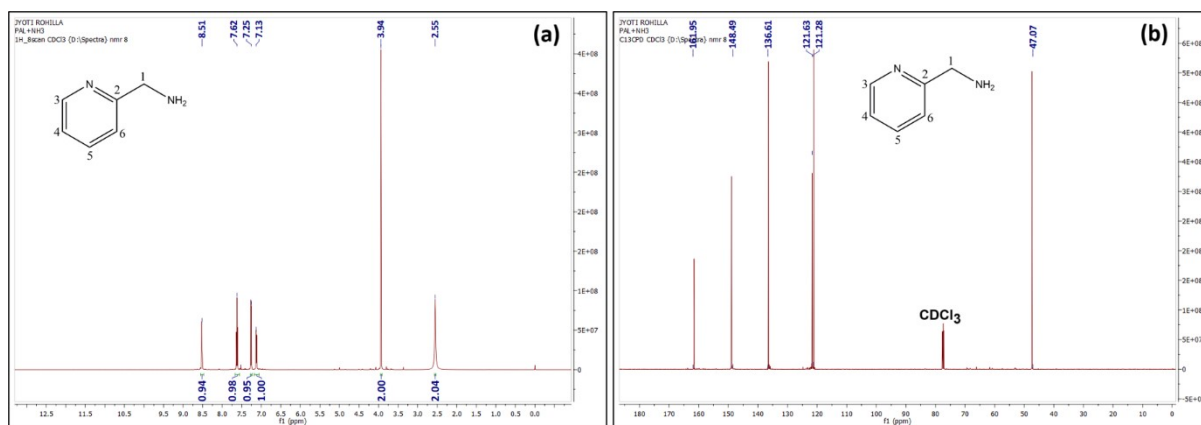

**Fig. S20**  $^1\text{H}$  and  $^{13}\text{C}$  spectra of 2-pyridine methanamine [  $^1\text{H}$  NMR (CDCl<sub>3</sub>, 500 MHz): 2.55 (s, 2H, -NH<sub>2</sub>), 3.90 (s, 2H, H<sup>1</sup>), 7.12 (dt, 1H, 3 J = 5 Hz, H<sup>4</sup>), 7.25 (d, 1H, 3 J = 10 Hz, H<sup>6</sup>), 7.62 (dt, 1H, 3J = 5 Hz, H<sup>5</sup>), 8.51 (d, 1H, 3J = 5 Hz, H<sup>3</sup>).  $^{13}\text{C}$  NMR (CDCl<sub>3</sub>, 125 MHz): (47.07, C<sup>1</sup>), (121.08, C<sup>4</sup>), (121.63, C<sup>6</sup>), (136.04, C<sup>5</sup>), (148.49, C<sup>3</sup>), (161.02, C<sup>2</sup>)].

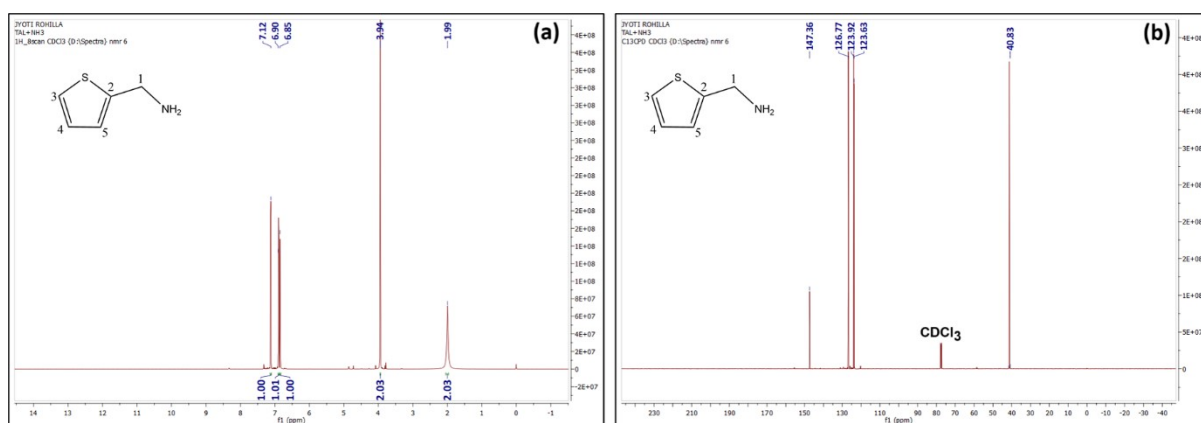

**Fig. S21**  $^1\text{H}$  and  $^{13}\text{C}$  spectra of 2-thiophene methanamine [  $^1\text{H}$  NMR (CDCl<sub>3</sub>, 500 MHz): 1.99 (s, 2H, -NH<sub>2</sub>), 3.94 (s, 2H, H<sup>1</sup>), 6.847 (m, 1H, 3 J = 5 Hz, H<sup>4</sup>), 6.891 (dd, 1H, 3 J = 5 Hz, H<sup>5</sup>), 7.125 (dd, 1H, 3J = 5 Hz, H<sup>3</sup>).  $^{13}\text{C}$  NMR (CDCl<sub>3</sub>, 125 MHz): (41.21, C<sup>1</sup>), (123.63, C<sup>3</sup>), (123.92, C<sup>5</sup>), (126.77, C<sup>4</sup>), (147.35, C<sup>2</sup>)]

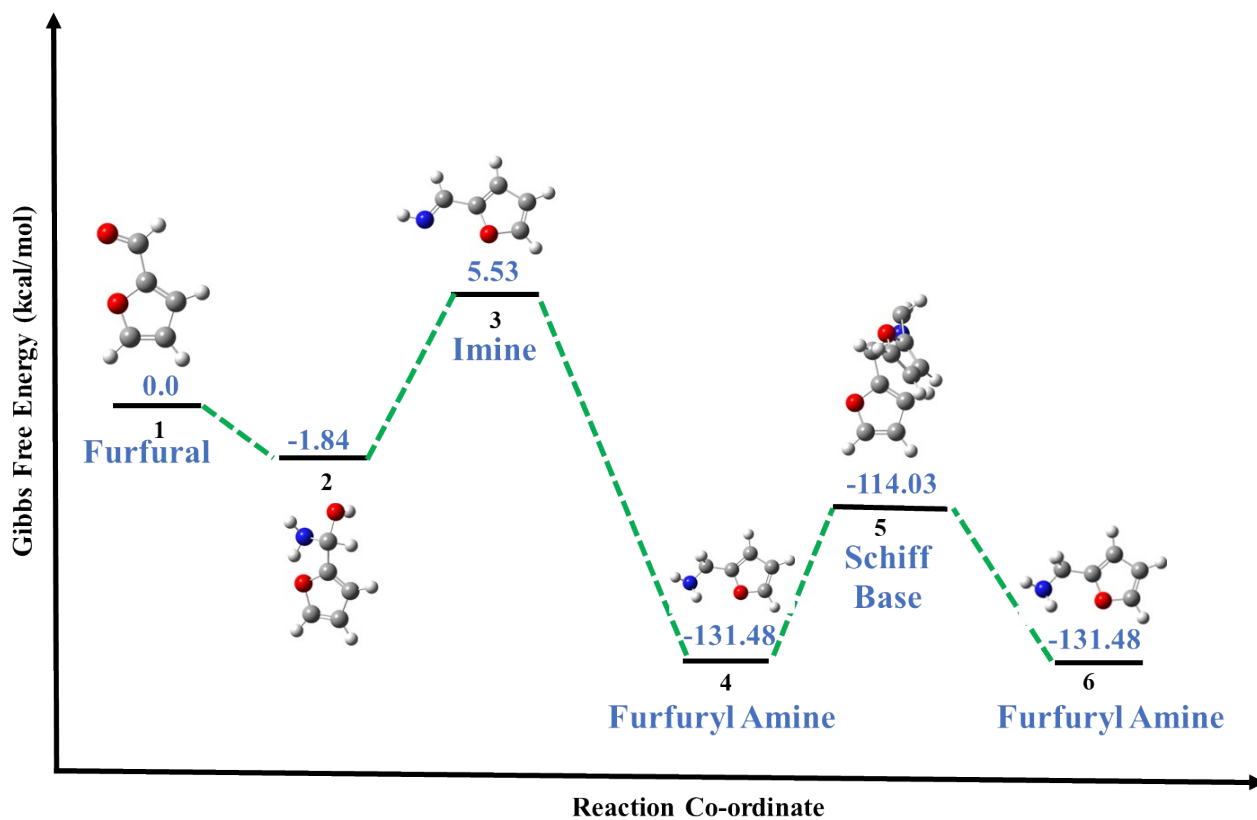

Fig. S22 Energy profile diagram of catalytic conversion of furfural to furfuryl amine.

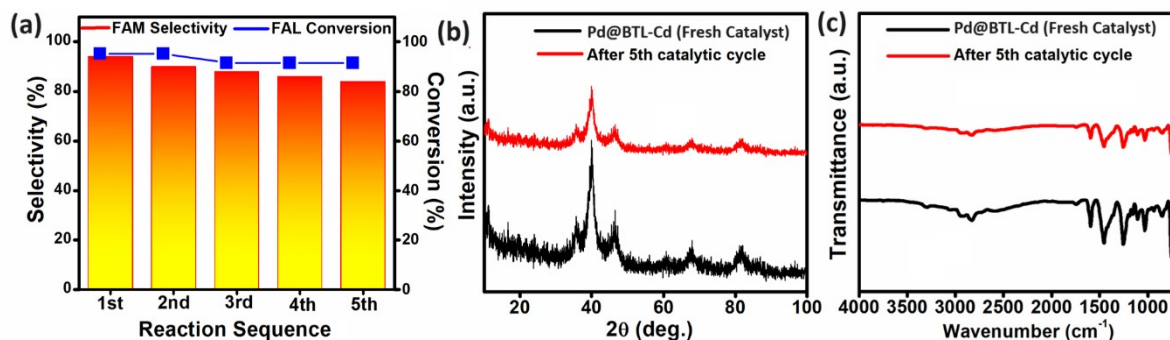

Fig. S23 (a) Recyclability study of Pd@BTL-Cd, (b) PXRD pattern of Pd@BTL-Cd fresh catalyst and after 5<sup>th</sup> catalytic cycles, (c) FTIR spectra of Pd@BTL-Cd fresh catalyst and after 5<sup>th</sup> catalytic cycles.

**Table S1** Crystallographic data and structural parameters for ligand BTL and BTL-Cd

| Parameters                                  | BTL                                                                           | BTL-Cd                                                                                        |
|---------------------------------------------|-------------------------------------------------------------------------------|-----------------------------------------------------------------------------------------------|
| Empirical formula                           | C <sub>27</sub> H <sub>39</sub> Cl <sub>3</sub> N <sub>4</sub> O <sub>3</sub> | C <sub>27</sub> H <sub>34</sub> Cd <sub>2</sub> Cl <sub>2</sub> N <sub>4</sub> O <sub>3</sub> |
| Formula weight                              | 573.97                                                                        | 758.28                                                                                        |
| Temperature/K                               | 293(2)                                                                        | 293(2)                                                                                        |
| Crystal system                              | monoclinic                                                                    | orthorhombic                                                                                  |
| Space group                                 | P2 <sub>1</sub> /n                                                            | P2 <sub>1</sub> 2 <sub>1</sub> 2                                                              |
| a/Å                                         | 10.0304(10)                                                                   | 26.9155(6)                                                                                    |
| b/Å                                         | 19.479(3)                                                                     | 15.7883(3)                                                                                    |
| c/Å                                         | 17.5363(18)                                                                   | 8.7097(2)                                                                                     |
| α/°                                         | 90                                                                            | 90                                                                                            |
| β/°                                         | 97.579(12)                                                                    | 90                                                                                            |
| γ/°                                         | 90                                                                            | 90                                                                                            |
| Volume/Å <sup>3</sup>                       | 3396.3(7)                                                                     | 3701.19(14)                                                                                   |
| Z                                           | 4                                                                             | 4                                                                                             |
| ρ <sub>calc</sub> /g/cm <sup>3</sup>        | 1.123                                                                         | 1.361                                                                                         |
| μ/mm <sup>-1</sup>                          | 0.300                                                                         | 1.321                                                                                         |
| F(000)                                      | 1216.0                                                                        | 1512.0                                                                                        |
| Crystal size/mm <sup>3</sup>                | 0.8 × 0.6 × 0.2                                                               | 0.7 × 0.4 × 0.2                                                                               |
| Radiation                                   | MoKα (λ = 0.71073)                                                            | Mo Kα (λ = 0.71073)                                                                           |
| 2θ range for data collection/°              | 6.282 to 57.472                                                               | 6.52 to 54.884                                                                                |
| Index ranges                                | -12 ≤ h ≤ 12, -24 ≤ k ≤ 23, -22 ≤ l ≤ 20                                      | -33 ≤ h ≤ 34, -20 ≤ k ≤ 13, -11 ≤ l ≤ 10                                                      |
| Reflections collected                       | 25032                                                                         | 31122                                                                                         |
| Independent reflections                     | 7133 [R <sub>int</sub> = 0.1827, R <sub>sigma</sub> = 0.1471]                 | 7869 [R <sub>int</sub> = 0.0386, R <sub>sigma</sub> = 0.0408]                                 |
| Data/restraints/parameters                  | 7133/0/337                                                                    | 7869/1/308                                                                                    |
| Goodness-of-fit on F <sup>2</sup>           | 0.904                                                                         | 1.037                                                                                         |
| Final R indexes [I ≥ 2σ (I)]                | R <sub>1</sub> = 0.0925, wR <sub>2</sub> = 0.2654                             | R <sub>1</sub> = 0.0346, wR <sub>2</sub> = 0.0678                                             |
| Final R indexes [all data]                  | R <sub>1</sub> = 0.1874, wR <sub>2</sub> = 0.3455                             | R <sub>1</sub> = 0.0486, wR <sub>2</sub> = 0.0719                                             |
| Largest diff. peak/hole / e Å <sup>-3</sup> | 0.49/-0.42                                                                    | 0.28/-0.31                                                                                    |

**Table S2** Selected bond length (Å) and bond angle (°) for BTL

| <b>Bond length (Å)</b> |          |               |           |
|------------------------|----------|---------------|-----------|
| <b>BTL</b>             |          | <b>BTL-Cd</b> |           |
| O1-C5                  | 1.358(7) | Cd01-O3       | 2.289(3)  |
| O2-C14                 | 1.367(6) | Cd01-O2       | 2.303(4)  |
| O3-C23                 | 1.379(7) | Cd01-N4       | 2.359(4)  |
| N1-C7                  | 1.506(6) | Cd02-C11      | 2.414(13) |
| N2-C27                 | 1.508(6) | Cd02-O3       | 2.184(4)  |
| N2-C11                 | 1.484(7) | Cd01-N2       | 2.331(4)  |
| C13-C18                | 1.373(7) | Cd01-N1       | 2.461(4)  |
| C5-C4                  | 1.391(7) | Cd01-N3       | 2.367(4)  |
| C10-C11                | 1.523(7) | Cd02-C12      | 2.421(17) |
| C22-C23                | 1.399(7) | Cd03-O2       | 2.148(3)  |

  

| <b>Bond angle (°)</b> |               |               |            |
|-----------------------|---------------|---------------|------------|
| <b>BTL</b>            |               | <b>BTL-Cd</b> |            |
| C7-N1-C8              | 115.3(4)      | O3-Cd01-N2    | 112.18(13) |
| C11-N2-C27            | 115.2(4)      | O3-Cd01-N1    | 153.81(15) |
| C9-N4-C10             | 110.2(4)      | O3-Cd01-N3    | 118.92(15) |
| C19-N4-C10            | 110.2(4)      | N2-Cd01-N4    | 111.09(17) |
| C19-N4-C9             | 110.4(4)      | O2-Cd01-N2    | 83.25(15)  |
| C21-N3-C20            | 113.7(4)      | O2-Cd01-N4    | 152.31(14) |
| O2-C14-C13            | 117.7(4)      | N4-Cd01-N1    | 74.42(16)  |
| C4-C3-C2              | 121.9(5)      | N3-Cd01-N1    | 73.99(15)  |
| C3-C4-C5              | 120.5(6)      | O3-Cd02-C11   | 116.95(11) |
| C6-C7-N1              | 112.3(4)      | O2-Cd02-C11   | 114.51(11) |
| C6-C1-C2              | 120.8(6)      | O2-Cd02-O3    | 78.12(13)  |
| C24-C25-C26           | 120.0(6)      | C18-O3-Cd01   | 131.6(3)   |
| N3-C20-C19            | 111.3(5)      | C8-N2-Cd01    | 110.9(3)   |
| C16-C15-C14           | 119.8(5)      | Cd02-O2-Cd01  | 104.78(14) |
|                       | <b>BTL-Cd</b> | C10-N1-Cd01   | 106.8(3)   |
| N4-Cd01-N3            | 109.76(16)    | C19-N1-C10    | 111.8(4)   |
| C11-Cd02-C12          | 112.43(6)     | O3-Cd01-O2    | 72.96(12)  |
| O3-Cd02-C12           | 114.63(11)    | O3-Cd01-N4    | 79.60(14)  |
| O2-Cd02-C12           | 116.26(12)    | N2-Cd01-N1    | 75.07(13)  |
| Cd02-O3-Cd01          | 104.05(14)    | N2-Cd01-N3    | 118.44(15) |
| C18-O3-Cd02           | 124.2(3)      | O2-Cd01-N1    | 133.17(14) |
| C7-N2-Cd01            | 114.3(3)      | O2-Cd01-N3    | 81.15(15)  |
| C23-O2-Cd01           | 121.2(2)      | C9-N1-Cd01    | 105.5(3)   |
| C19-N1-Cd01           | 109.3(3)      | C12-N4-Cd01   | 110.8(4)   |

**Table S3** Previous reported Palladium based catalytic systems for reductive amination of furfural

| S. N. | Catalyst                                             | Hydrogen Source    | Substrate (mmol) | Solvent       | NH <sub>3</sub> (mmol)                                  | Temp. (°C) | Time (h) | Yield of FAM | Ref.             |
|-------|------------------------------------------------------|--------------------|------------------|---------------|---------------------------------------------------------|------------|----------|--------------|------------------|
| 1.    | Pd/CNT                                               | Formic Acid        | 1                | Methanol      | -                                                       | 120        | 6        | >99          | 50               |
| 2.    | Pd/SiO <sub>2</sub>                                  | H <sub>2</sub> gas | 1                | Dioxane/water | 5                                                       | 120        | 10       | 10           | 16               |
| 3.    | Pd/HZSM-5(46)                                        | H <sub>2</sub> gas | 2                | Methanol      | 7 M                                                     | 100        | 15 min   | 44           | 3                |
| 4.    | Ru/Nb <sub>2</sub> O <sub>5</sub>                    | H <sub>2</sub> gas | 0.5              | MeOH          | 8                                                       | 90         | 4        | 89           | 51               |
| 5.    | Co@NC-800                                            | H <sub>2</sub> gas | 1                | EtOH          | 28                                                      | 130        | 12       | 82           | 52               |
| 6.    | Ru NPs                                               | H <sub>2</sub> gas | 0.5              | MeOH          | 8                                                       | 90         | 2        | 90           | 53               |
| 7.    | Ru/TiO <sub>2</sub>                                  | H <sub>2</sub> gas | 0.5              | MeOH          | 8                                                       | 90         | 4        | 72           | 51               |
| 8.    | Fe <sub>3</sub> O <sub>4</sub> @SiO <sub>2</sub> -Ni | H <sub>2</sub> gas | 1                | EtOH          | 750 μL                                                  | 120        | 2        | 73           | 54               |
| 9.    | Raney Ni                                             | H <sub>2</sub> gas | 5                | MeOH          | NH <sub>3</sub> (g) (0.1 MPa)                           | 120        | 2        | 65           | 55               |
| 10.   | Ru/BNC                                               | H <sub>2</sub> gas | 0.12             | MeOH          | N <sub>2</sub> H <sub>4</sub> ·2H <sub>2</sub> O (0.48) | 80         | 16       | 95           | 56               |
| 11.   | 0.5% Ru/P25                                          | Ethanol            | 0.5              | EtOH          | 8                                                       | rt         | 6        | 69           | 19               |
| 12.   | Ni/CaCO <sub>3</sub>                                 | Water/Zn           | 5                | Water         | 20                                                      | 80         | 10       | 91           | 17               |
| 13.   | <b>Pd@BTL-Cd</b>                                     | <b>Water</b>       | <b>5</b>         | <b>Water</b>  | <b>8</b>                                                | <b>RT</b>  | <b>4</b> | <b>97</b>    | <b>This Work</b> |

**Table S4** Optimization of different aldehyde sources for the catalytic activity of Pd@BTL-Cd

| S.No. | Substrate                  | Product                 | Product Yield (%) |
|-------|----------------------------|-------------------------|-------------------|
| 1.    | Benzaldehyde               | Benzyl Amine            | 79                |
| 2.    | 2-Thiophene Carboxaldehyde | 2-Thiophene methylamine | 83                |
| 3.    | 2-Pyridine Carboxaldehyde  | 2-pyridyl methyl amine  | 80                |



## Section S1

### Detailed calculation of acidic active sites of Pd@BTL-Cd:

Calibration Factor (counts/mmol) = 35,890,228

Weight of catalyst = 0.0588 g

Area (count) at 209.7 °C = 5,34,351

Area (count) at 237.6 °C = 43,89,992

Total area (counts) = 49,24,343

$$\text{NH}_3 \text{ desorbed (mmol)} = \frac{\text{Total area (counts)}}{\text{Calibration Factor (counts/mmol)}} = \frac{49,24,343}{35,890,228} = 0.1372 \text{ mmol}$$

$$\text{Acidic Sites (mmol)} = \frac{\text{NH}_3 \text{ desorbed (mmol)}}{\text{Catalyst weight (g)}} = \frac{0.1372}{0.0588} = 2.33 \text{ mmol/g}$$

## Section S2

### Detailed calculation of Turnover Number:

In a heterogeneous catalytic reaction, active sites refer to the specific sites capable of facilitating a particular reaction. The no. of acidic site available in the catalyst was calculated through TPD studies. The available acidic sites act as catalytic active sites for the reaction.

The available acidic sites present in Pd@BTL-Cd = 2.333 mmol g<sup>-1</sup>

According to TPD studies,

1 g of Pd@BTL-Cd contain active sites = 2.333 mmol g<sup>-1</sup>

10 mg of Pd@BTL-Cd contain active sites = 2.33 × 10<sup>-2</sup> mmol g<sup>-1</sup>

The effectiveness of the catalyst in a reaction system is typically expressed as the turnover number (TON), which quantifies the number of reactions occurring per active site. The TON value can be calculated as follows:

$$\text{TON} = \frac{\% \text{ yield} \times \text{No. of moles of reactant}}{\text{No. of moles of catalyst}}$$

For the catalytic reaction,

$$\% \text{ yield} = \frac{\textit{Selectivity}\% \times \textit{Conversion}\%}{100}$$

$$= 98 \times 99/100$$

$$= 97.02 \%$$

$$\text{TON} = \frac{97.02 \times 5}{2.33 \times 10^{-2}}$$

$$= 20819 \text{ mmolg}^{-1}$$

$$\text{Mol \%} = \frac{\textit{Moles of catalyst} \times 100}{\textit{Moles of reactant}}$$

$$= \frac{2.33 \times 10^{-2} \text{ mmol} \times 100}{5 \text{ mmol}}$$

$$= 0.5\%$$
